# Supplementary material for: Intraoperative thermal insulation in off-pump coronary artery bypass grafting surgery: a prospective, double blind, randomized controlled, single-center study
Source: PubMed Central journal article supplement — Ann Transl Med. 2020 Oct;8(19):1220. doi: 10.21037/atm-19-4571 (PMC7607130; doi:10.21037/atm-19-4571), 2020-10
Supplement: atm-08-19-1220-dss.pdf [file atm-08-19-1220-dss.pdf]

| Data Sharing Statement        |                                                                                             |                                                       |
|-------------------------------|---------------------------------------------------------------------------------------------|-------------------------------------------------------|
| Article information           | <a href="http://dx.doi.org/10.21037/atm-20-4571">http://dx.doi.org/10.21037/atm-20-4571</a> |                                                       |
| Section                       | Question                                                                                    | Authors' Response<br>(place "-" if not applicable)    |
| Data collected for your study | Will the data collected for your study be made available to others?                         | Yes, our data can be shared to others.                |
|                               | If not, would you like to share the reason for your decision?                               | -                                                     |
|                               | What data in particular will be shared?                                                     | No specific, all research related data can be shared. |
|                               | Any additional information about data?                                                      | -                                                     |
|                               | How or where can the data be obtained?                                                      | They can write email to correspondence author.        |
|                               | When will data availability begin?                                                          | After the article Online                              |
|                               | When will data availability end?                                                            | One year after article online.                        |
| Supporting documents          | Will any supporting documents be available?                                                 | -                                                     |
|                               | Which supporting documents?                                                                 | -                                                     |
|                               | Any additional information about supporting documents?                                      | -                                                     |
|                               | How or where can supporting documents be obtained?                                          | -                                                     |
|                               | When will supporting documents availability begin?                                          | -                                                     |
|                               | When will supporting documents availability end?                                            | -                                                     |
| Restrictions                  | To whom will data be available?                                                             | -                                                     |
|                               | For what type of analysis or purpose?                                                       | -                                                     |
|                               | By what mechanism?                                                                          | -                                                     |
|                               | Any other restrictions?                                                                     | -                                                     |
| Additional information        |                                                                                             | -                                                     |
